# Supplementary material for: Activating the oxygen electrocatalytic activity of layer-structured Ca0.5CoO2 nanofibers by iron doping
Source: Royal Society of Chemistry journal article supplement (doi:10.1039/d1dt03883d), 2022-01-01
Supplement: d1dt03883d1.pdf [file d1dt03883d1.pdf]

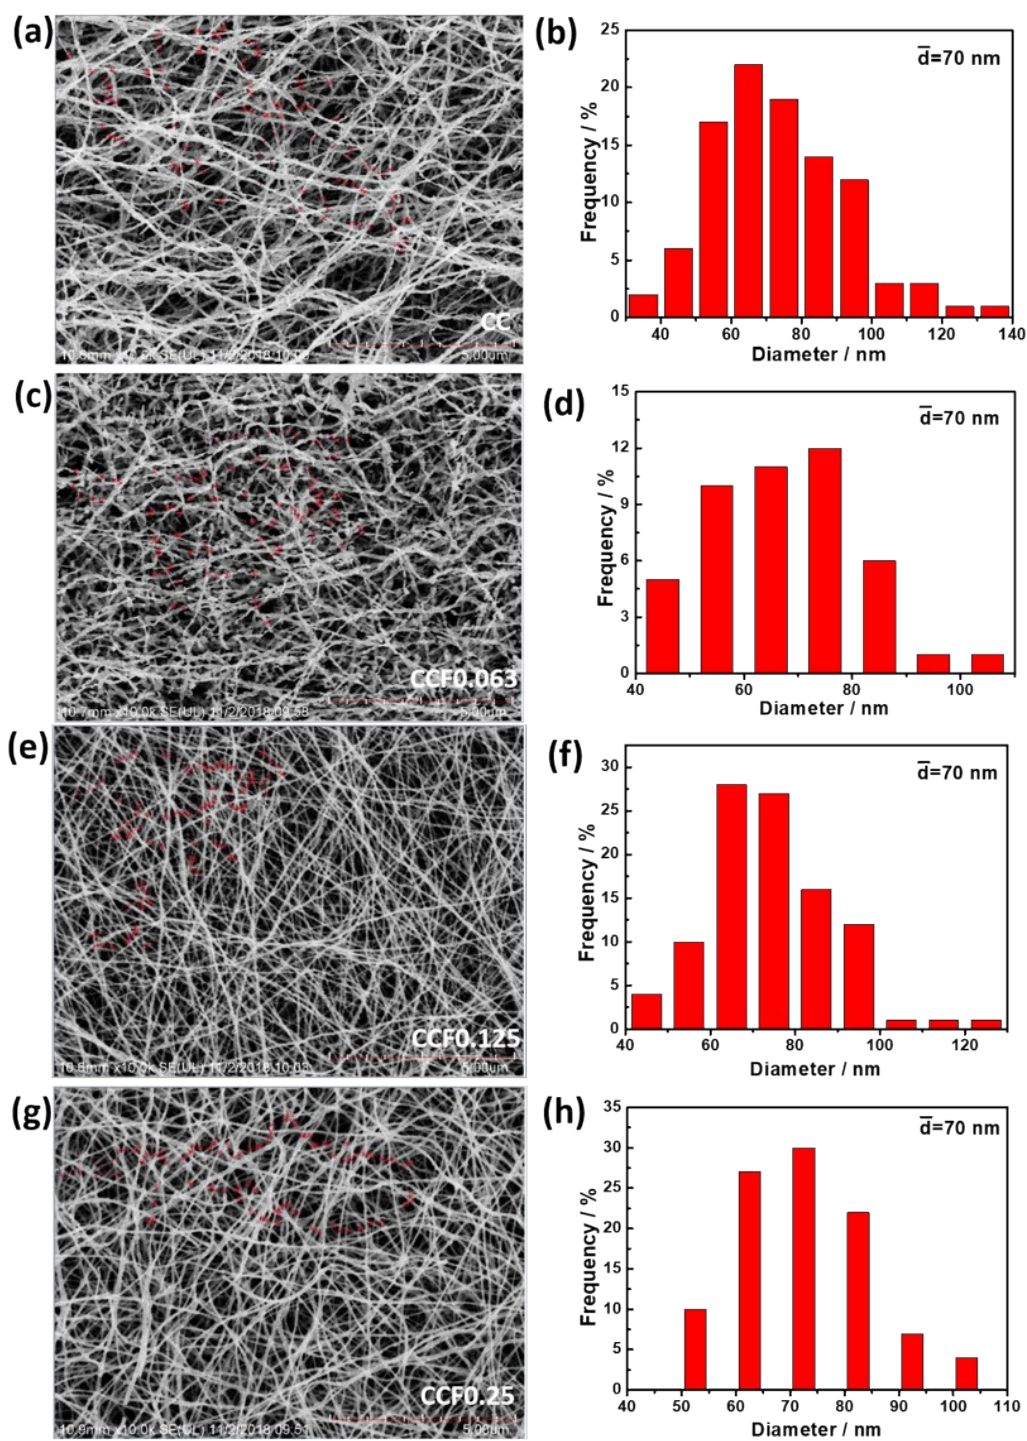

Figure S1. SEM images and the corresponding diameter distribution of nanofibers calcined at 650 °C for 3h: (a, b) CC, (c, d) CCF0.063, (e, f) CCF0.125 and (g, h) CCF0.25.

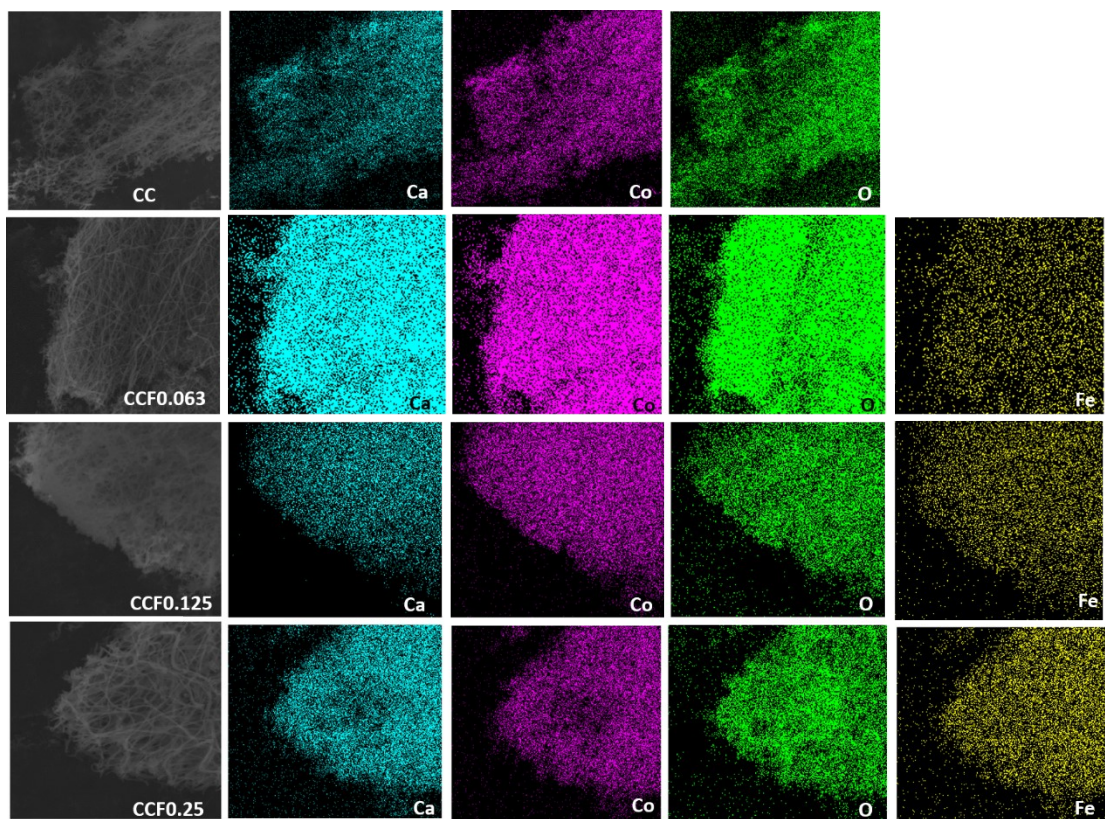

Figure S2. SEM images and corresponding EDX mapping of Ca, Co, Fe and O in CC, CCF0.063, CCF0.125 and CCF0.25.

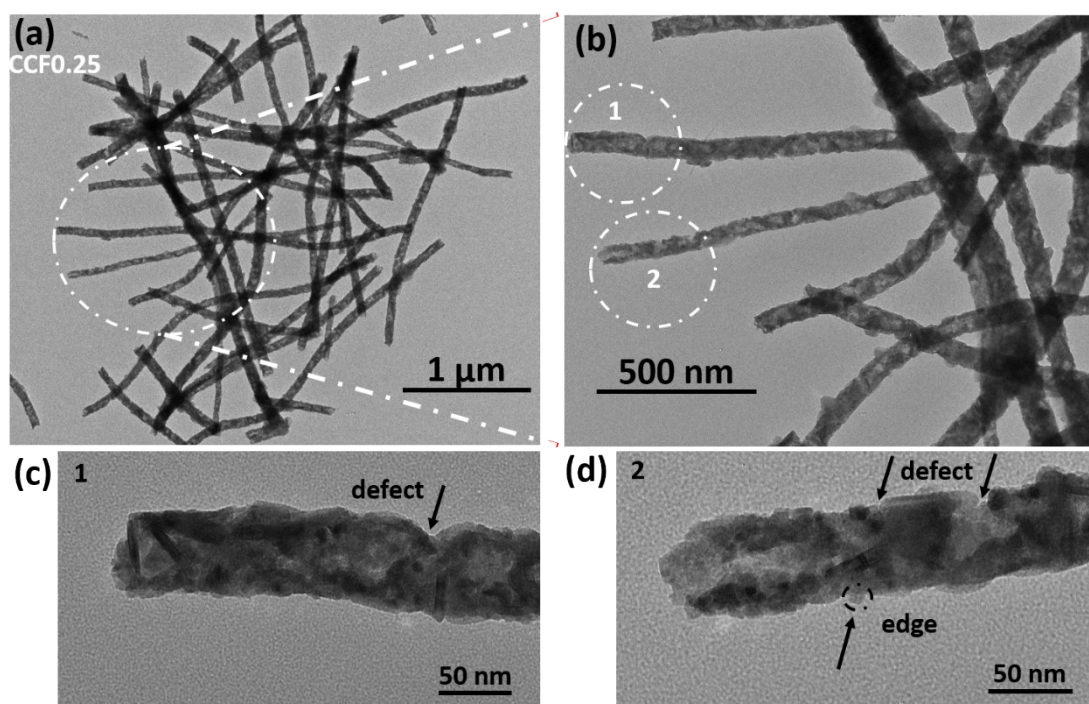

Figure S3. HRTEM image of CCF0.25, (b-d) are enlarged images of (a).

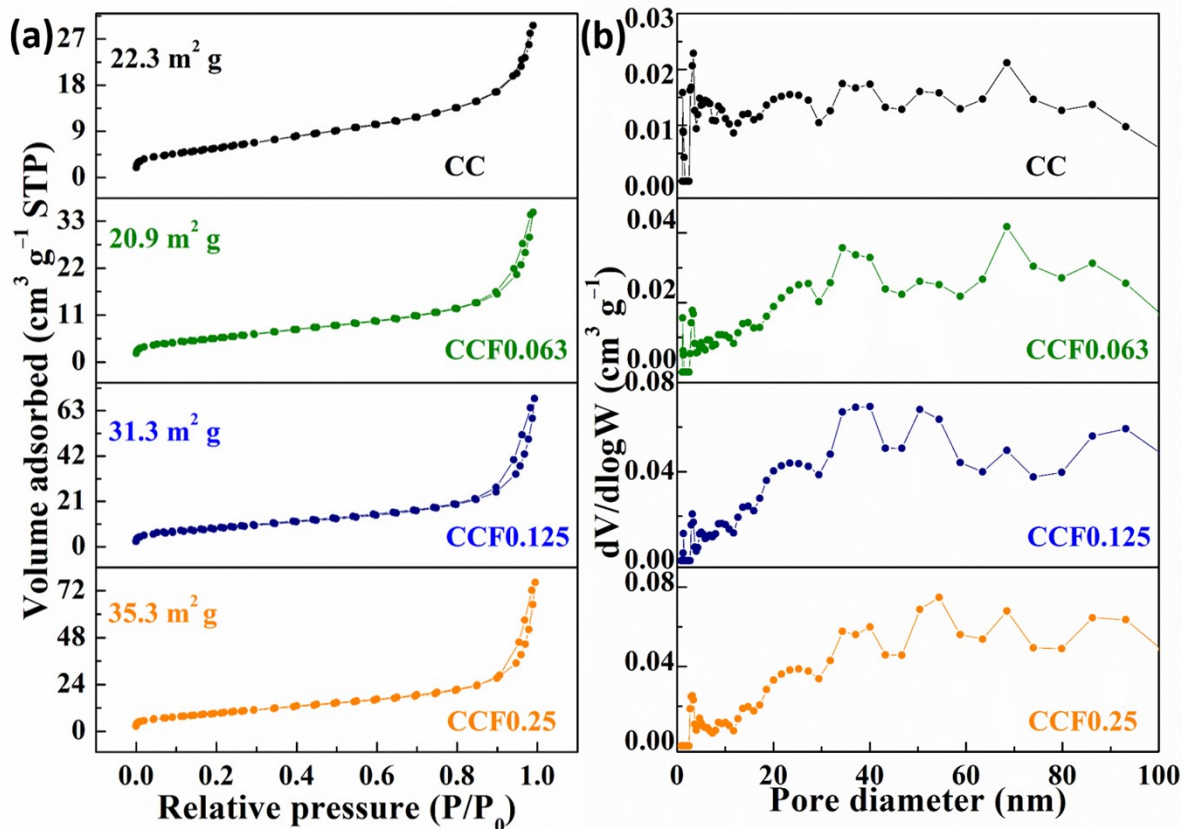

Figure S4. (a) N<sub>2</sub> adsorption and desorption isotherm and (b) the pore size distribution of CC, CCF0.063, CCF0.125 and CCF0.25.

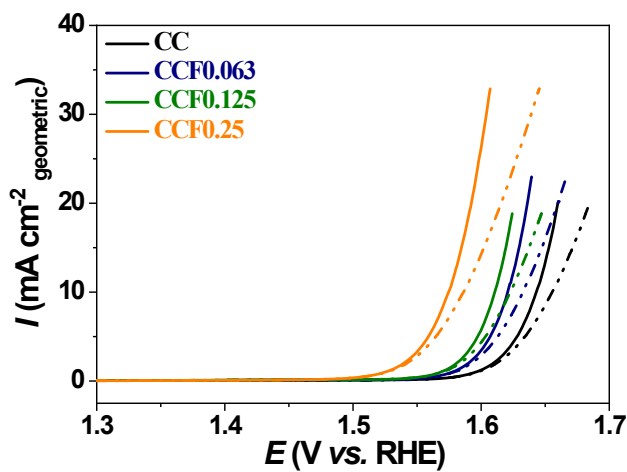

Figure S5. Original (dash dot dot lines) and  $iR$ -corrected (solid lines) OER LSV curves of CC, CCF0.063, CCF0.125 and CCF0.25 nanofibers.

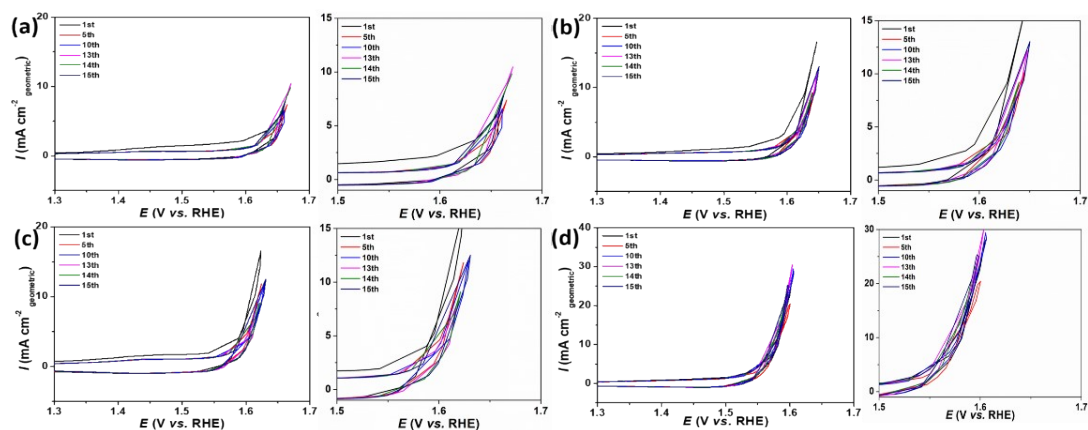

Figure S6. CV curves of the electrocatalysts in 1 M KOH at  $100 \text{ mV s}^{-1}$  with a rotation rate of 1,600 rpm: (a) CC, (b) CCF0.063, (c) CCF0.125 and (d) CCF0.25.

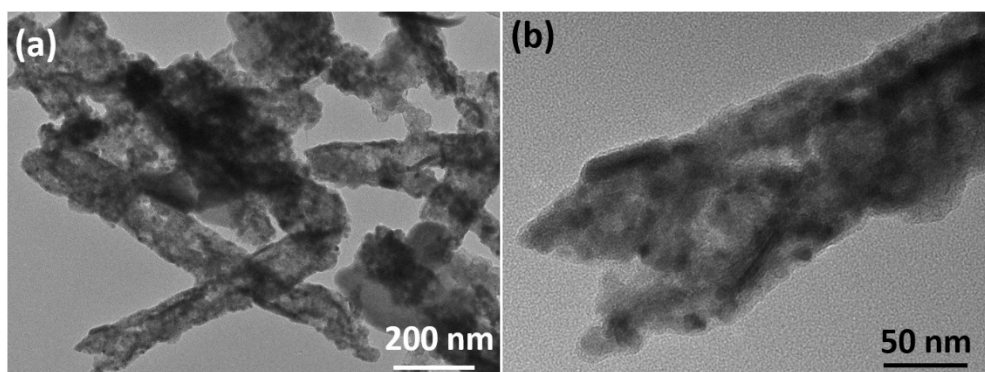

Figure S7. TEM images of the CCF0.25 nanofibers after stability test for 12 h.

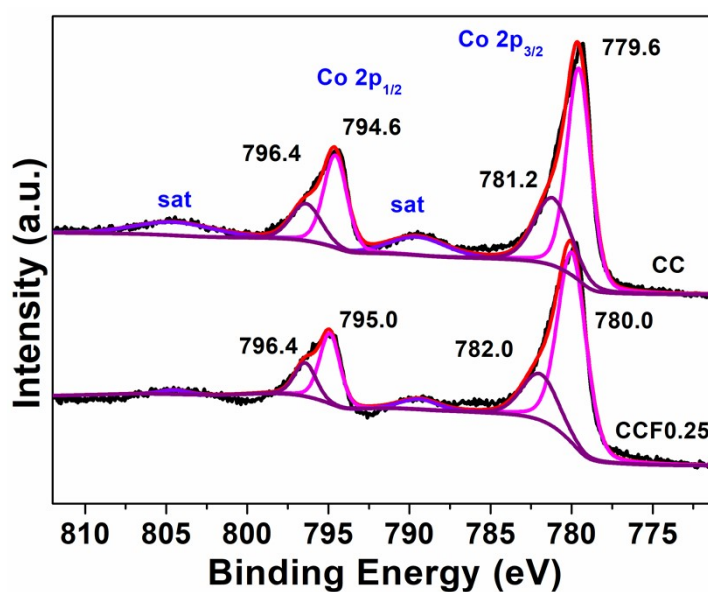

Figure S8. High-resolution XPS spectra of Co 2p.

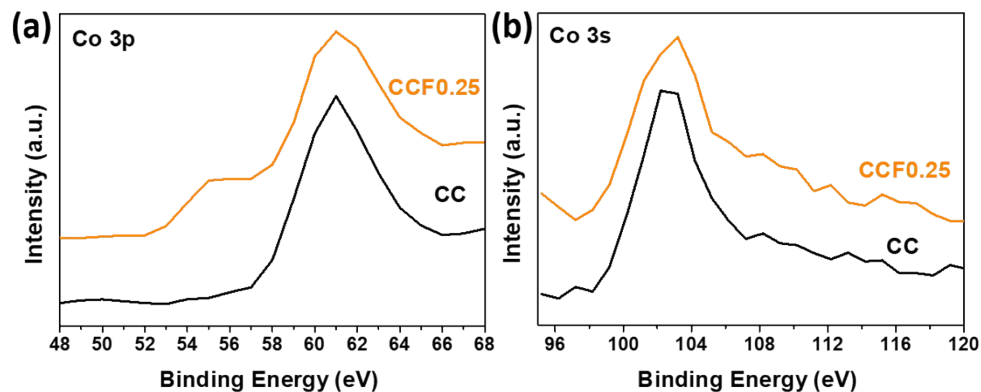

Figure S9. XPS spectra of (a) Co 3p and (b) Co 3s in the CC and CCF0.25.

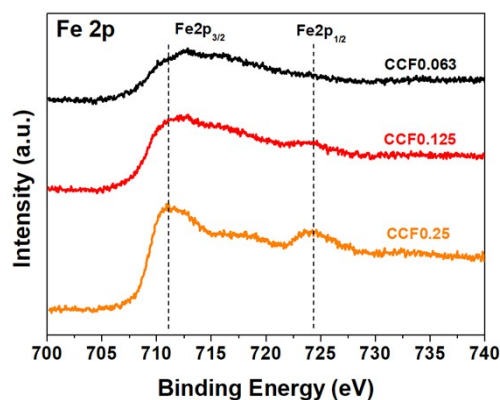

Figure S10. XPS spectra of Fe 2p in the CC, CCF0.063, CCF0.125 and CCF0.25.

Table S1 elemental proportion of Co and Fe in CC, CCF0.063, CCF0.125 and CCF0.25

| Samples  | SEM mapping/at. % |       |
|----------|-------------------|-------|
|          | Co                | Fe    |
| CC       | 1                 | /     |
| CCF0.063 | 0.936             | 0.064 |
| CCF0.125 | 0.877             | 0.123 |
| CCF0.25  | 0.746             | 0.254 |

Table S2. Detailed parameters of the electrocatalysts in our work

| Catalyst | $\eta@10 \text{ mA cm}^{-2}$<br>(mV) | Tafel slope<br>(mV dec <sup>-1</sup> ) | $R_{ct}$<br>( $\Omega \text{ cm}^2$ ) | mass activity<br>(A g <sup>-1</sup> ) | Intrinsic activity<br>(A m <sup>-2</sup> ) |
|----------|--------------------------------------|----------------------------------------|---------------------------------------|---------------------------------------|--------------------------------------------|
| CC       | 410                                  | 40.1                                   | 20.4                                  | 6.58                                  | 0.30                                       |
| CCF0.063 | 390                                  | 40.2                                   | 10.6                                  | 18.1                                  | 0.88                                       |
| CCF0.125 | 380                                  | 40.1                                   | 5.6                                   | 28.0                                  | 0.90                                       |
| CCF0.25  | 346                                  | 39.3                                   | 2.1                                   | 129.9                                 | 3.71                                       |

Table S3. Comparison of OER properties over different catalysts in basic solution

| Catalyst                                                                                        | Electrode collector | Electrolyte | $\eta@10$ mA<br>cm <sup>-2</sup> (mV) | Tafel slope<br>(mV dec <sup>-1</sup> ) | Mass loading<br>(mg cm <sup>-2</sup> ) | Reference                                           |
|-------------------------------------------------------------------------------------------------|---------------------|-------------|---------------------------------------|----------------------------------------|----------------------------------------|-----------------------------------------------------|
| CCF0.25                                                                                         | Glassy carbon (GC)  | 1 M KOH     | 346                                   | 39.3                                   | 0.202                                  | This work                                           |
| ELCMO                                                                                           | GC                  | 1 M KOH     | 329                                   | 33.8                                   | 0.4                                    | <i>Adv. Energy Mater.</i> , <b>2019</b> , 1803482   |
| CoZn-Se                                                                                         | GC                  | 1 M KOH     | 320                                   | 66                                     | 0.19                                   | <i>ACS Nano</i> , <b>2019</b> , 13, 5, 5635-5645    |
| La <sub>1-x</sub> Ce <sub>x</sub> CoO <sub>3</sub>                                              | GC                  | 1 M NaOH    | 380                                   | 80                                     | 0.734                                  | <i>Nanoscale</i> , <b>2021</b> , 13, 9952           |
| {Cu <sub>2</sub> SiW <sub>12</sub> O <sub>40</sub> }@HKUST-1                                    | GC                  | 1 M KOH     | 340                                   | 73                                     | -                                      | <i>J. Mater. Chem. A</i> , <b>2021</b> , 9, 13161   |
| Co-MoOx                                                                                         | GC                  | 1 M KOH     | 340                                   | 49                                     | 0.28                                   | <i>J. Mater. Chem. A</i> , <b>2019</b> , 7, 1005    |
| CoNi-NS/rGO                                                                                     | GC                  | 1 M KOH     | 330                                   | 62                                     | 0.48                                   | <i>Energy Storage Mater.</i> , <b>2019</b> , 16, 24 |
| Ru/RuO <sub>2</sub> on La <sub>0.9</sub> Fe <sub>0.92</sub> Ru <sub>0.08</sub> O <sub>3-δ</sub> | GC                  | 1M KOH      | 380                                   | 39                                     | 0.255                                  | <i>Chem Eng J</i> , <b>2021</b> , 418, 129422       |
| Fe@N-CNT/HMCS                                                                                   | GC                  | 1 M KOH     | 350                                   | 76                                     | 1.0                                    | <i>Appl. Catal., B</i> , <b>2019</b> , 243, 151     |
| Ni-MOF@CNT                                                                                      | GC                  | 1 M KOH     | 370                                   | 138.2                                  | -                                      | <i>Appl. Catal., B</i> , <b>2021</b> , 285, 119793  |
